# Supplementary material for: The Shape of an Auxin Pulse, and What It Tells Us about the Transport Mechanism
Source: PubMed Central journal article supplement (PMC4618354; doi:10.1371/journal.pcbi.1004487), 2015-10-20
Supplement: pcbi.1004487.s003.pdf [file pcbi.1004487.s003.pdf]

## The velocity and spreading rate for the simple model

Recall that, in the simple model, flux is given by  $\phi = pa_{n-1} + q(a_{n-1} - a_n)$ . Assuming there is no creation or destruction of auxin within cells, this implies

$$L \frac{da_n}{dt} = p(a_{n-1} - a_n) + q(a_{n-1} + a_{n+1} - 2a_n),$$

where  $L$  is the length of a cell. If the distribution describes a pulse, then the distance,  $\mu$ , that its mean travels in time  $t$  is given by

$$\mu = \sum_n nLa_n / \sum_n a_n \quad (S1)$$

and the velocity,  $v$ , is the derivative of the mean:

$$\begin{aligned} v &= d\mu/dt = \left( \sum_n nLda_n/dt \right) / \sum_n a_n \\ &= \sum_n n \left[ p(a_{n-1} - a_n) + q(a_{n-1} + a_{n+1} - 2a_n) \right] / \sum_n a_n, \\ &= p \left[ \sum_n (n-1)a_{n-1} + \sum_n a_{n-1} - \sum_n na_n \right] / \sum_n a_n \\ &\quad + q \left[ \sum_n (n-1)a_{n-1} + \sum_n a_{n-1} + \sum_n (n+1)a_{n+1} - \sum_n a_{n+1} - 2n \sum_n a_n \right] / \sum_n a_n, \\ &= p \sum_n a_n / \sum_n a_n, \\ &= p, \end{aligned} \quad (S2)$$

which is Eq (2).

To compute the spreading rate,  $\rho$ , recall that this is defined to be  $\rho = d(Var)/dt$ , where the variance is given by:

$$Var = \frac{\sum_n (nL - \mu)^2 a_n}{\sum_n a_n} = \frac{\sum_n n^2 L^2 a_n}{\sum_n a_n} - \mu^2. \quad (S3)$$

We have

$$\begin{aligned} d/dt \sum_n n^2 L^2 a_n &= \sum_n n^2 L^2 da_n/dt \\ &= L \sum_n n^2 (p(a_{n-1} - a_n) + q(a_{n-1} + a_{n+1} - 2a_n)) \\ &= L(p+q) \sum_n [(n-1)^2 + 2(n-1) + 1] a_{n-1} - L(p+2q) \sum_n n^2 a_n \\ &\quad + Lq \sum_n [(n+1)^2 - 2(n+1) + 1] a_{n+1}, \\ &= 2Lp \sum_n na_n + L(p+2q) \sum_n a_n, \end{aligned}$$

where the last step follows if we ignore end effects, so

$$\begin{aligned} \sum_n (n-1)a_{n-1} &= \sum_n (n+1)a_{n+1} = \sum_n na_n \\ \sum_n (n-1)^2 a_{n-1} &= \sum_n (n+1)^2 a_{n+1} = \sum_n n^2 a_n. \end{aligned}$$

Thus

$$\begin{aligned} \rho &= \frac{d(Var)}{dt} = \frac{\sum_n n^2 L^2 da_n/dt}{\sum_n a_n} - 2\mu \frac{d\mu}{dt}, \\ &= 2p\mu + L(p+2q) - 2p\mu, \\ &= L(p+2q), \end{aligned} \quad (S4)$$

which is Eq (3).

One can also write down a continuous version of the model:

$$\frac{\partial a}{\partial t} = -p \frac{\partial a}{\partial x} + q \frac{\partial^2 a}{\partial x^2}, \quad (\text{S5})$$

which has a gaussian solution

$$a = \frac{1}{\sqrt{2\pi qt}} e^{-(x-pt)^2/2qt}. \quad (\text{S6})$$

This explains why a gaussian is such a good approximation in the discrete case.
