# Supplementary material for: The Shape of an Auxin Pulse, and What It Tells Us about the Transport Mechanism
Source: PubMed Central journal article supplement (PMC4618354; doi:10.1371/journal.pcbi.1004487), 2015-10-20
Supplement: pcbi.1004487.s006.pdf [file pcbi.1004487.s006.pdf]

## Loading does not affect the velocity or spreading rate

Loading can be described by a function  $\phi(t)$  which gives the rate of uptake of auxin from the source at time  $t$ . We assume that loading is complete after some time  $\tau$ , so  $\phi(t) = 0$  for  $t > \tau$ , and that the loading function is normalised, so that  $\int_0^\tau \phi(t)dt = 1$ .

We show that the velocity and spreading rate measured after time  $\tau$  are the same as for instantaneous loading. Suppose the pulse produced after time  $t$  following instantaneous loading is  $\psi(x, t)$ . We assume the pulse is normalised, in the sense that  $\int_{-\infty}^\infty \psi(x, t)dx = 1$ . We assume the instantaneously loaded pulse function travels at velocity  $v$ , so

$$\int_{-\infty}^\infty x\psi(x, t)dx = vt, \tag{S1}$$

and has spreading rate  $\rho$ , so

$$\int_{-\infty}^\infty (x - vt)^2\psi(x, t)dx = \rho t. \tag{S2}$$

The total pulse at time  $T$  after loading with the function  $\phi(t)$  is

$$f(x, T) = \int_0^T \psi(x, T - t)\phi(t)dt.$$

Using Eq (S1), the mean of the pulse at time  $T > \tau$  is

$$m = \int x f(x, T)dx = v \int_0^T (T - t)\phi(t)dt = v(T - \bar{t}),$$

where  $\bar{t}$  is the mean of the loading function. Thus the velocity of the pulse is  $dm/dT = v$ , which is independent of the loading function.

The variance is

$$\begin{aligned} \text{var} &= \int_{x=-\infty}^\infty (x - vT + v\bar{t})^2 f(x, T)dx, \\ &= \int_{x=-\infty}^\infty \int_0^T (x - vT + v\bar{t})^2 \psi(x, T - t)\phi(t)dt dx, \\ &= \int_{x=-\infty}^\infty \int_0^T [(x - vT + vt)^2 + 2v(\bar{t} - t)(x - vT) + v^2(\bar{t}^2 - t^2)] \psi(x, T - t)\phi(t)dt dx, \\ &= (T - \bar{t})\rho + v^2 \int_0^T (t - \bar{t})^2 \phi(t)dt. \end{aligned}$$

The integral in the second term is the variance of the loading function if  $T > \tau$ . Thus the only term depending on  $T$  is  $T\rho$ , and therefore the spreading rate  $d\text{var}/dT$  is  $\rho$ . This is independent of the loading function.
